# Supplementary material
Source: publisher figshare collection journal article supplement (https://sage.figshare.com/ndownloader/files/17937689)
Supplement: Supplementary file 1 [file 17937689]

## **Appendix 1: Questionnaires**

### **Adolescent Questionnaire**

#### **Section 1: Information about you**

**1.Are you a boy or a girl?**

- ☐ Boy
- ☐ Girl

**2.What age are you?**

- ☐ Under 14
- ☐ Under 16
- ☐ Under 18 (Minor)

**3.What sport do you play?**

- ☐ Gaelic football
- ☐ Hurling
- ☐ Both

**4.What position do you usually play?**

- ☐ Goalkeeper
- ☐ In the backs
- ☐ Midfield
- ☐ In the forwards

**5.How many years have you been playing Gaelic games?**

- ☐ 0-2 years
- ☐ 2-4 years
- ☐ 4-6 years
- ☐ 6-8 years
- ☐ 8-10 years
- ☐ More than 10 years

**6.How often is there a medical/healthcare professional at your training sessions?**

- ☐ Never
- ☐ Sometimes
- ☐ Most of the time
- ☐ Always
- ☐ There is no medical personnel involved with my team

**7.How often is there a medical/healthcare professional at your matches?**

- ☐ Never
- ☐ Sometimes
- ☐ Most of the time
- ☐ Always

☐ There is no medical personnel involved with my team

## **Section 2: Past concussion history**

### **8. During your time playing Gaelic football or hurling:**

|                                                                                            | <b>0</b> | <b>1-2</b> | <b>3-5</b> | <b>6-10</b> | <b>More than 10</b> |
|--------------------------------------------------------------------------------------------|----------|------------|------------|-------------|---------------------|
| How many times did you think you were concussed                                            |          |            |            |             |                     |
| How many times did a medical or healthcare professional diagnose or say you were concussed |          |            |            |             |                     |

### **9. If you ever thought you had a concussion during a Gaelic training session or match, which of the following describes how you managed the situation at that time?**

|                                                                                      | <b>Yes</b> | <b>No</b> | <b>N/A</b> |
|--------------------------------------------------------------------------------------|------------|-----------|------------|
| I told nobody as I did not think it was serious enough                               |            |           |            |
| It was an important match and I really wanted to keep playing                        |            |           |            |
| We were losing the match and I kept playing                                          |            |           |            |
| It was a training session so I told the manager/coach and stopped training           |            |           |            |
| Was not sure if I was concussed or not concussed                                     |            |           |            |
| I told the manager/coach but they said, "run it off"                                 |            |           |            |
| I told the manager/coach and they stopped me playing straight away                   |            |           |            |
| I felt under pressure to keep playing by the manager/coach                           |            |           |            |
| I felt like I would be letting my parents down if I came off                         |            |           |            |
| There was only a couple of minutes left in the match/training so I continued to play |            |           |            |

### **10. What was the longest amount of time you could not play Gaelic games because you were concussed?**

- ☐ N/A
- ☐ Less than a week
- ☐ 1 - 2 weeks
- ☐ 2 - 3 weeks
- ☐ 3 - 4 weeks
- ☐ 4 - 12 weeks
- ☐ More than 12 weeks

### **Section 3: Concussion Knowledge**

**11. When I say concussion, what do you think:**

|                                                                                                     | <b>Strongly agree</b> | <b>Agree</b> | <b>Neither agree or disagree</b> | <b>Disagree</b> | <b>Strongly disagree</b> |
|-----------------------------------------------------------------------------------------------------|-----------------------|--------------|----------------------------------|-----------------|--------------------------|
| A concussion is a serious injury                                                                    |                       |              |                                  |                 |                          |
| You must be "knocked out" in order to be concussed                                                  |                       |              |                                  |                 |                          |
| You can become concussed without receiving a direct knock to the head                               |                       |              |                                  |                 |                          |
| Concussion symptoms are immediately present after a concussion                                      |                       |              |                                  |                 |                          |
| If an underage player has a concussion, they should not return to play that day                     |                       |              |                                  |                 |                          |
| A concussion could result in death if not managed properly                                          |                       |              |                                  |                 |                          |
| Long-term complications include memory loss, depression, personality changes and movement disorders |                       |              |                                  |                 |                          |

**12. Please select which of the following symptoms are associated with concussion:**

|                                          | <b>Yes</b> | <b>No</b> | <b>I don't know</b> |
|------------------------------------------|------------|-----------|---------------------|
| Headache                                 |            |           |                     |
| Dizziness                                |            |           |                     |
| Fatigue                                  |            |           |                     |
| Increased Thirst                         |            |           |                     |
| Tooth ache                               |            |           |                     |
| Agitation                                |            |           |                     |
| Double Vision                            |            |           |                     |
| Feeling in a "cloud/haze"                |            |           |                     |
| Sensitivity to Light                     |            |           |                     |
| Loss of Smell                            |            |           |                     |
| Memory Loss                              |            |           |                     |
| Nausea                                   |            |           |                     |
| The feeling of needing to use the toilet |            |           |                     |

**13. Please select which of the following signs are associated with concussion:**

|                | <b>Yes</b> | <b>No</b> | <b>I don't know</b> |
|----------------|------------|-----------|---------------------|
| Confusion      |            |           |                     |
| Slurred speech |            |           |                     |
| Poor balance   |            |           |                     |

|                                                                 |  |  |  |
|-----------------------------------------------------------------|--|--|--|
| Sweating more than usual                                        |  |  |  |
| Vomiting                                                        |  |  |  |
| Bruising on the face                                            |  |  |  |
| Bleeding from the head/face                                     |  |  |  |
| Increased emotional behaviour (sad, angry, scared, worried etc) |  |  |  |

#### **Section 4: Concussion Attitudes**

**14.If you were to suspect that you were concussed, would you report it if:**

|                                        | Definitely not | No | Maybe | Yes | Definitely |
|----------------------------------------|----------------|----|-------|-----|------------|
| It was a league game                   |                |    |       |     |            |
| It was a championship game             |                |    |       |     |            |
| It was a training session              |                |    |       |     |            |
| It was a challenge match               |                |    |       |     |            |
| There was a "big" match coming up soon |                |    |       |     |            |

**15.Please rank in order of importance of who you would tell if you suspected that you may be concussed during a match?**

|                                 | Extremely important | Important | Somewhat important | Not important |
|---------------------------------|---------------------|-----------|--------------------|---------------|
| Manager/Coach                   |                     |           |                    |               |
| Team-mate                       |                     |           |                    |               |
| Referee                         |                     |           |                    |               |
| Parent                          |                     |           |                    |               |
| Other family members            |                     |           |                    |               |
| Friends                         |                     |           |                    |               |
| Medical/healthcare professional |                     |           |                    |               |
| Nobody                          |                     |           |                    |               |

**16.Which of the following reasons would stop you from reporting a concussion**

|                                                                | Yes | No | Maybe |
|----------------------------------------------------------------|-----|----|-------|
| Feeling like you're letting your manager down                  |     |    |       |
| Feeling like you're letting your team mates down               |     |    |       |
| Feeling like you're letting your friends/family/community down |     |    |       |
| Feeling under pressure to continue to play                     |     |    |       |
| Feeling afraid of losing your position in the team             |     |    |       |
| Thinking that the concussion is not a big deal                 |     |    |       |
| Feeling that you can manage it yourself                        |     |    |       |

**17.If you suspected that your team mate was concussed during a match:**

|                                                                   | Yes | No | Maybe |
|-------------------------------------------------------------------|-----|----|-------|
| Would you want them to continue playing for the sake of the team? |     |    |       |
| Would you tell them to stop playing?                              |     |    |       |
| Would you inform the manager/coach?                               |     |    |       |

|                                                                         |  |  |  |
|-------------------------------------------------------------------------|--|--|--|
| Would you inform the team medical/healthcare professional (if present)? |  |  |  |
| Would you inform the referee?                                           |  |  |  |
| Would you ignore it/do nothing?                                         |  |  |  |

## **Section 5: Concussion rehabilitation and return to play**

**18. On average, how long do you think it takes to return to full sporting participation after a concussion?**

- ☐ 1- 3 days
- ☐ 4 - 7 days
- ☐ 7 - 10 days
- ☐ 11- 14 days
- ☐ 15 - 20 days
- ☐ I think I could continue to play as normal on the same day

**19. After a concussion:**

|                                                                  | <b>Strongly agree</b> | <b>Agree</b> | <b>Neither agree or disagree</b> | <b>Disagree</b> | <b>Strongly disagree</b> |
|------------------------------------------------------------------|-----------------------|--------------|----------------------------------|-----------------|--------------------------|
| Complete rest is advised for 24 hours                            |                       |              |                                  |                 |                          |
| A standardised return to play protocol exists                    |                       |              |                                  |                 |                          |
| The team medical/healthcare professional                         |                       |              |                                  |                 |                          |
| Rehabilitation is pointless as only time will fix the concussion |                       |              |                                  |                 |                          |

**20. Who should have the final say on when an athlete can return to play following a concussion**

- ☐ The underage player themselves
  - ☐ Parent
  - ☐ Medical/healthcare professional
  - ☐ Manager/Coach
  - ☐ Team mates
  - ☐ Other (please specify)
-

## **Section 6: Concussion Education**

### **21. It is important for underage players to be educated about:**

|                                                   | <b>Strongly agree</b> | <b>Agree</b> | <b>Neither agree or disagree</b> | <b>Disagree</b> | <b>Strongly disagree</b> |
|---------------------------------------------------|-----------------------|--------------|----------------------------------|-----------------|--------------------------|
| The signs/symptoms of concussion                  |                       |              |                                  |                 |                          |
| How to manage a concussion properly straight away |                       |              |                                  |                 |                          |
| The long-term health risks of a concussion        |                       |              |                                  |                 |                          |
| What a concussion is                              |                       |              |                                  |                 |                          |
| When it is safe to return to play                 |                       |              |                                  |                 |                          |

### **22. Have you ever received concussion education from?**

|                                 | <b>Yes</b> | <b>No</b> |
|---------------------------------|------------|-----------|
| Online Videos                   |            |           |
| Information Sheets              |            |           |
| Manager/Coach                   |            |           |
| Medical/healthcare professional |            |           |
| Seminars                        |            |           |
| Websites                        |            |           |

### **23. With regards to future concussion education:**

|                                                                                                    | <b>Yes</b> | <b>No</b> | <b>Maybe</b> | <b>I don't know</b> |
|----------------------------------------------------------------------------------------------------|------------|-----------|--------------|---------------------|
| Would you like to receive more education?                                                          |            |           |              |                     |
| Would increasing your concussion knowledge create a safer environment for you and your team-mates? |            |           |              |                     |
| Would you like to receive education in the form of information sheets?                             |            |           |              |                     |
| Would you like to receive education in the form of online videos?                                  |            |           |              |                     |

### **24. Please mention any concussion education resources for Gaelic games players that you are aware of:**

|  |
|--|
|  |
|--|

### **25. When would you like to receive concussion education?**

- ☐ Pre-season



- ☐ Mid-Season
  - ☐ Multiple times throughout the season
  - ☐ Other (please specify)
-

## Parent Questionnaire

### Section 1: Background information

**1. Are you a male or female?**

- ☐ Male
- ☐ Female

**2. How old are you?**

- ☐ <20
- ☐ 21-30
- ☐ 31-40
- ☐ 41-50
- ☐ 51-60
- ☐ >60

**3. What sport(s) does your son/daughter play?**

- ☐ Gaelic football
- ☐ Hurling
- ☐ Both

**4. What age group is your son/daughter currently playing at?**

- ☐ Under 14
- ☐ Under 16
- ☐ Under 18 (Minor)

**5. Are you involved in your son/daughter's underage GAA team or another underage GAA team as a coach/mentor?**

- ☐ Yes
- ☐ No

**6. How often is a team medical/healthcare professional at your son/daughter's training sessions?**

- ☐ Never
- ☐ Occasionally
- ☐ Most of the time
- ☐ Always
- ☐ There is no medical personnel involved with my son/daughter's team

**7. How often is a team medical/healthcare professional present at your son/daughter's matches?**

- ☐ Never
- ☐ Occasionally
- ☐ Most of the time
- ☐ Always
- ☐ There is no medical personnel involved with my son/daughter's team

## **Section 2: Past personal experience of concussion**

Now we would like to ask you some questions in relation to a potential experience your son/daughter may have had with concussion.

**8. In your son/daughter's time playing Gaelic games, have you ever suspected they were concussed? (If you answer NO then skip to Q.11)**

- ☐ Yes
- ☐ No
- ☐ I don't know
- ☐ I suspected they were, but wasn't sure

**9. On the most recent occasion your son/daughter has had concussion, what did you do at that time?**

|                                                                                      | Yes | No | Somewhat |
|--------------------------------------------------------------------------------------|-----|----|----------|
| Requested removal of your son/daughter from the training/match                       |     |    |          |
| Got the medical or healthcare profession (if present) to check your son/daughter out |     |    |          |
| Notified the referee/coaches that your son/daughter had a concussion                 |     |    |          |
| Brought your son/daughter to hospital A&E                                            |     |    |          |
| Brought your son/daughter to your GP                                                 |     |    |          |
| Checked your son/daughter yourself                                                   |     |    |          |
| Let your son/daughter continue to play that day                                      |     |    |          |
| Let your son/daughter play the following day                                         |     |    |          |
| Let your son/daughter continue to play but realise their behaviour is unusual        |     |    |          |
| You were not present at the match/training and were notified manager                 |     |    |          |

**10. On the most recent occasion you suspected your son/daughter had a concussion:**

|                                                                                                                                    | Yes | No | Somewhat |
|------------------------------------------------------------------------------------------------------------------------------------|-----|----|----------|
| Did you feel you had adequate knowledge to manage the situation                                                                    |     |    |          |
| Did you feel you had adequate medical support available for your son/daughter                                                      |     |    |          |
| Were you confident that you knew what to do                                                                                        |     |    |          |
| Did you worry about how you handled the situation after the event occurred                                                         |     |    |          |
| On reflection, were you happy with how you dealt with the situation                                                                |     |    |          |
| On reflection, would you have managed the situation differently                                                                    |     |    |          |
| Did you feel the referee/coaches identified and treated the situation seriously                                                    |     |    |          |
| On reflection, were you confident that the referee/coaches knew how to manage the situation to ensure safety for your son/daughter |     |    |          |

### **Section 3. Concussion Knowledge**

#### **11. With regards to concussion:**

|                                                                                                 | <b>Strongly agree</b> | <b>Agree</b> | <b>Neither agree or disagree</b> | <b>Disagree</b> | <b>Strongly disagree</b> |
|-------------------------------------------------------------------------------------------------|-----------------------|--------------|----------------------------------|-----------------|--------------------------|
| A concussion is a serious injury                                                                |                       |              |                                  |                 |                          |
| Loss of consciousness is necessary to be concussed                                              |                       |              |                                  |                 |                          |
| A player can become concussed without having received a direct blow to the head                 |                       |              |                                  |                 |                          |
| Concussion symptoms are immediately present after the injury occurs                             |                       |              |                                  |                 |                          |
| An underage player with suspected concussion should not return to play that day                 |                       |              |                                  |                 |                          |
| A concussion could result in death                                                              |                       |              |                                  |                 |                          |
| Long term complications include memory loss, confusion, personality changes, movement disorders |                       |              |                                  |                 |                          |

#### **12. Please select which of the following symptoms are associated with concussion:**

|                                                               | <b>Yes</b> | <b>No</b> | <b>I don't know</b> |
|---------------------------------------------------------------|------------|-----------|---------------------|
| Confusion                                                     |            |           |                     |
| Slurred speech                                                |            |           |                     |
| Poor balance                                                  |            |           |                     |
| Excessive sweating                                            |            |           |                     |
| Vomiting                                                      |            |           |                     |
| Bruising on the face                                          |            |           |                     |
| Bleeding from the head/face                                   |            |           |                     |
| Increase in emotional behaviour (sad, angry, scared, worried) |            |           |                     |

#### **13. Please select which of the following signs are associated with concussion:**

|                           | <b>Yes</b> | <b>No</b> | <b>I don't know</b> |
|---------------------------|------------|-----------|---------------------|
| Headache                  |            |           |                     |
| Dizziness                 |            |           |                     |
| Fatigue                   |            |           |                     |
| Increased thirst          |            |           |                     |
| Toothache                 |            |           |                     |
| Agitation                 |            |           |                     |
| Double vision             |            |           |                     |
| Feeling in a "cloud/haze" |            |           |                     |
| Sensitivity to light      |            |           |                     |

|                                |  |  |  |
|--------------------------------|--|--|--|
| Loss of smell                  |  |  |  |
| Memory loss                    |  |  |  |
| Nausea                         |  |  |  |
| Increased sensation to urinate |  |  |  |

#### **Section 4: Concussion attitudes**

**14. In the future, if you suspected your son/daughter had a concussion, and were present at the match/training would you remove them from play if:**

|                                               | Definitely not | No | Maybe | Yes | Definitely |
|-----------------------------------------------|----------------|----|-------|-----|------------|
| It was a league game                          |                |    |       |     |            |
| It was a Championship game                    |                |    |       |     |            |
| It was a training session                     |                |    |       |     |            |
| It was a challenge match                      |                |    |       |     |            |
| If there was a “big” match in the near future |                |    |       |     |            |
| It was a trial for their county underage team |                |    |       |     |            |

**15. In your opinion, who should be responsible for: (please select as many boxes as you feel necessary in each row)**

|                                                                               | Manager/coach | Parent | Underage player themselves | Medical/healthcare profession | Referee | Other team-mates |
|-------------------------------------------------------------------------------|---------------|--------|----------------------------|-------------------------------|---------|------------------|
| Identifying a concussion in an underage player                                |               |        |                            |                               |         |                  |
| Removing an underage player from the training/match                           |               |        |                            |                               |         |                  |
| Deciding if an underage player can return to play in that same training/match |               |        |                            |                               |         |                  |

**16. Which of the following reasons would prevent you from removing your son/daughter from the field of play:**

|                                                                  | Yes | No | Maybe |
|------------------------------------------------------------------|-----|----|-------|
| Your son/daughter said they were fine                            |     |    |       |
| They are an important player for the team                        |     |    |       |
| His/her team are losing the match                                |     |    |       |
| You feel under pressure from the manager/team/players            |     |    |       |
| You feel under pressure from other parents in the crowd          |     |    |       |
| You do not want to "make a scene"                                |     |    |       |
| You do not trust the medical/healthcare professional's diagnosis |     |    |       |
| You are confident that they are not concussed                    |     |    |       |
| You feel like you have no control in the situation               |     |    |       |

**17. What would you do in the following scenarios:**

|                                                                                                                                                          | Request your son/daughter is removed from the field of play | Let them continue to play | Have the medical/healthcare professional check them again |
|----------------------------------------------------------------------------------------------------------------------------------------------------------|-------------------------------------------------------------|---------------------------|-----------------------------------------------------------|
| The medical/healthcare professional thinks your son/daughter is concussed but your son/daughter says they are OK                                         |                                                             |                           |                                                           |
| The medical/healthcare professional thinks they are concussed but YOU think they are OK                                                                  |                                                             |                           |                                                           |
| You think your son/daughter is concussed but your son/daughter says they are OK (medical/healthcare professional NOT available)                          |                                                             |                           |                                                           |
| Your son/daughter receives a blow to the head but gets up immediately and says they are OK (no medical/healthcare professional available)                |                                                             |                           |                                                           |
| Minutes after the medical/healthcare professional deems your son/daughter is OK, you notice that they seem slowed, uncoordinated, or just not themselves |                                                             |                           |                                                           |
| The medical/healthcare professional thinks your son/daughter is concussed but your son/daughter says they are OK                                         |                                                             |                           |                                                           |

### **Section 5: Concussion rehabilitation and return to play**

**18. On average, how long does it take to return to play following a concussion?**

- ☐ 1-3 days
- ☐ 4-7 days
- ☐ 7-10 days
- ☐ 11-14 days
- ☐ 15-20 days
- ☐ > 20 days

**19. Following a concussion:**

|                                                                      | <b>Strongly agree</b> | <b>Agree</b> | <b>Neither agree or disagree</b> | <b>Disagree</b> | <b>Strongly disagree</b> |
|----------------------------------------------------------------------|-----------------------|--------------|----------------------------------|-----------------|--------------------------|
| An underage player needs complete rest for 24 hours                  |                       |              |                                  |                 |                          |
| A standard return to play protocol exists                            |                       |              |                                  |                 |                          |
| The teams medical/healthcare professional can provide rehabilitation |                       |              |                                  |                 |                          |
| Rehabilitation is pointless as only time will fix concussion         |                       |              |                                  |                 |                          |

**20. How important are the following people in determining when a player can return to play following a concussion?**

**(1=not important, 5=extremely important)**

|                                 | <b>Extremely important</b> | <b>Important</b> | <b>Somewhat important</b> | <b>Not important</b> |
|---------------------------------|----------------------------|------------------|---------------------------|----------------------|
| The underage player themselves  |                            |                  |                           |                      |
| Medical/healthcare professional |                            |                  |                           |                      |
| Manager/coach                   |                            |                  |                           |                      |
| Team-mates                      |                            |                  |                           |                      |
| Parent                          |                            |                  |                           |                      |



## **Section 6: Concussion Education**

### **21. It is important for parents to be educated about concussion:**

|                                          | <b>Strongly agree</b> | <b>Agree</b> | <b>Neither agree or disagree</b> | <b>Disagree</b> | <b>Strongly disagree</b> |
|------------------------------------------|-----------------------|--------------|----------------------------------|-----------------|--------------------------|
| The signs/symptoms of concussion         |                       |              |                                  |                 |                          |
| The immediate management of concussion   |                       |              |                                  |                 |                          |
| The long-term health risks of concussion |                       |              |                                  |                 |                          |
| What a concussion is                     |                       |              |                                  |                 |                          |
| When is it safe to return to play        |                       |              |                                  |                 |                          |

### **22. Have you ever received concussion education from:**

|                                 | <b>Yes</b> | <b>No</b> |
|---------------------------------|------------|-----------|
| Online videos                   |            |           |
| Information sheets              |            |           |
| Medical/healthcare professional |            |           |
| Seminars                        |            |           |
| Websites                        |            |           |

### **23. With regards future concussion education:**

|                                                                                            | <b>Yes</b> | <b>No</b> | <b>Maybe</b> | <b>I don't know</b> |
|--------------------------------------------------------------------------------------------|------------|-----------|--------------|---------------------|
| Would you like to receive more education?                                                  |            |           |              |                     |
| Do you think that it would make you take control of future concussions your child may get? |            |           |              |                     |
| Would you like to receive information in the form of information sheets?                   |            |           |              |                     |
| Would you like to receive information in the form of online videos?                        |            |           |              |                     |
| Would you like to receive education in the form of medical professional lead teaching?     |            |           |              |                     |

### **24. Please name any concussion education resources for parents of Gaelic Games underage athletes that you are aware of:**

|  |
|--|
|  |
|--|
